# OP9 Bone Marrow Stroma Cells Differentiate into Megakaryocytes and Platelets

Yumiko Matsubara<sup>1\*</sup>, Yukako Ono<sup>2</sup>, Hidenori Suzuki<sup>3</sup>, Fumio Arai<sup>4</sup>, Toshio Suda<sup>4</sup>, Mitsuru Murata<sup>1</sup>, Yasuo Ikeda<sup>5</sup>

**1** Department of Laboratory Medicine, Keio University School of Medicine, Tokyo, Japan, **2** Division of Hematology, Department of Medicine, Keio University School of Medicine, Tokyo, Japan, **3** Department of Morphological and Biomolecular Research, Nippon Medical School, Tokyo, Japan, **4** Department of Cell Differentiation, Keio University School of Medicine, Tokyo, Japan, **5** Faculty of Science and Engineering, Life Science and Medical Bioscience, Waseda University, Tokyo, Japan

## Abstract

Platelets are essential for hemostatic plug formation and thrombosis. The mechanisms of megakaryocyte (MK) differentiation and subsequent platelet production from stem cells remain only partially understood. The manufacture of megakaryocytes (MKs) and platelets from cell sources including hematopoietic stem cells and pluripotent stem cells have been highlighted for studying the platelet production mechanisms as well as for the development of new strategies for platelet transfusion. The mouse bone marrow stroma cell line OP9 has been widely used as feeder cells for the differentiation of stem cells into MK lineages. OP9 cells are reported to be pre-adipocytes. We previously reported that 3T3-L1 pre-adipocytes differentiated into MKs and platelets. In the present study, we examined whether OP9 cells differentiate into MKs and platelets using MK lineage induction (MKLI) medium previously established to generate MKs and platelets from hematopoietic stem cells, embryonic stem cells, and pre-adipocytes. OP9 cells cultured in MKLI medium had megakaryocytic features, i.e., positivity for surface markers CD41 and CD42b, polyploidy, and distinct morphology. The OP9-derived platelets had functional characteristics, providing the first evidence for the differentiation of OP9 cells into MKs and platelets. We then analyzed gene expressions of critical factors that regulate megakaryopoiesis and thrombopoiesis. The gene expressions of p45NF-E2, FOG, Fli1, GATA2, RUNX1, thrombopoietin, and c-mpl were observed during the MK differentiation. Among the observed transcription factors of MK lineages, p45NF-E2 expression was increased during differentiation. We further studied MK and platelet generation using p45NF-E2-overexpressing OP9 cells. OP9 cells transfected with p45NF-E2 had enhanced production of MKs and platelets. Our findings revealed that OP9 cells differentiated into MKs and platelets *in vitro*. OP9 cells have critical factors for megakaryopoiesis and thrombopoiesis, which might be involved in a mechanism of this differentiation. p45NF-E2 might also play important roles in the differentiation of OP9 cells into MK lineage cells.

**Citation:** Matsubara Y, Ono Y, Suzuki H, Arai F, Suda T, et al. (2013) OP9 Bone Marrow Stroma Cells Differentiate into Megakaryocytes and Platelets. PLoS ONE 8(3): e58123. doi:10.1371/journal.pone.0058123

**Editor:** Linzhao Cheng, Johns Hopkins Univ. School of Medicine, United States of America

**Received:** September 18, 2012; **Accepted:** January 31, 2013; **Published:** March 1, 2013

**Copyright:** © 2013 Matsubara et al. This is an open-access article distributed under the terms of the Creative Commons Attribution License, which permits unrestricted use, distribution, and reproduction in any medium, provided the original author and source are credited.

**Funding:** This work was supported by the Grants-in-Aid from the Ministry of Education, Culture, Sports, Science, and Technology of Japan (<http://www.mext.go.jp/>) (#21591250 to Y. Matsubara and #22659183 to Y. Ikeda and Y. Matsubara) and from the Japanese Ministry of Health Labor and Welfare (<http://www.mhlw.go.jp/>) for blood coagulation abnormalities (to M. Murata). The funders had no role in study design, data collection and analysis, decision to publish, or preparation of the manuscript.

**Competing Interests:** The authors have declared that no competing interests exist.

\* E-mail: yumikoma@a7.keio.jp

## Introduction

Platelets play critical roles in hemostatic plug formation and thrombosis [1–3]. Platelets are released from terminally differentiated megakaryocytes (MKs). The underlying molecular mechanisms of megakaryopoiesis and subsequent thrombopoiesis are only partially understood [4–10]. Current advances in a culture system to generate MKs and platelets *in vitro* help us to clarify the mechanism underlying MK differentiation and platelet production [11]. Also, studies on new strategies to manufacture MKs and platelets pursue to develop a donor-independent source for platelet transfusion [11].

MKs and platelets have been differentiated from hematopoietic stem cells (HSCs), embryonic stem (ES) cells, fetal liver cells, induced pluripotent stem (iPS) cells, and fibroblasts transfected with a combination of p45NF-E2, Maf G, and Maf K, *in vitro* [12–19]. Moreover, we reported the generation of MKs and functional

platelets from both normal human subcutaneous adipose tissues and mouse pre-adipocyte cell line 3T3-L1 [20–22]. Differentiation of pre-adipocytes into MKs and platelets has been observed when the culture medium is switched from maintenance medium to MK lineage induction (MKLI) medium previously established to generate platelets from HSCs and ES cells [21–24].

The mouse bone marrow stroma cell line OP9 was established from macrophage colony stimulating factor deficient osteopetrotic mice [25]. OP9 cells have been widely used as feeder cells for the differentiation of ES cells and iPS cells into hematopoietic cells as well as for the differentiation of these stem cells into MKs and platelets [12–15, 25–27]. Also, OP9 cells were reported to be pre-adipocytes [28, 29]. In the present study, we examined whether OP9 cells differentiate MKs and platelets, based on our previous observations that pre-adipocytes differentiated into MKs and platelets [20–22], and then investigated the involved mechanisms of MK differentiation and platelet production from OP9 cells.

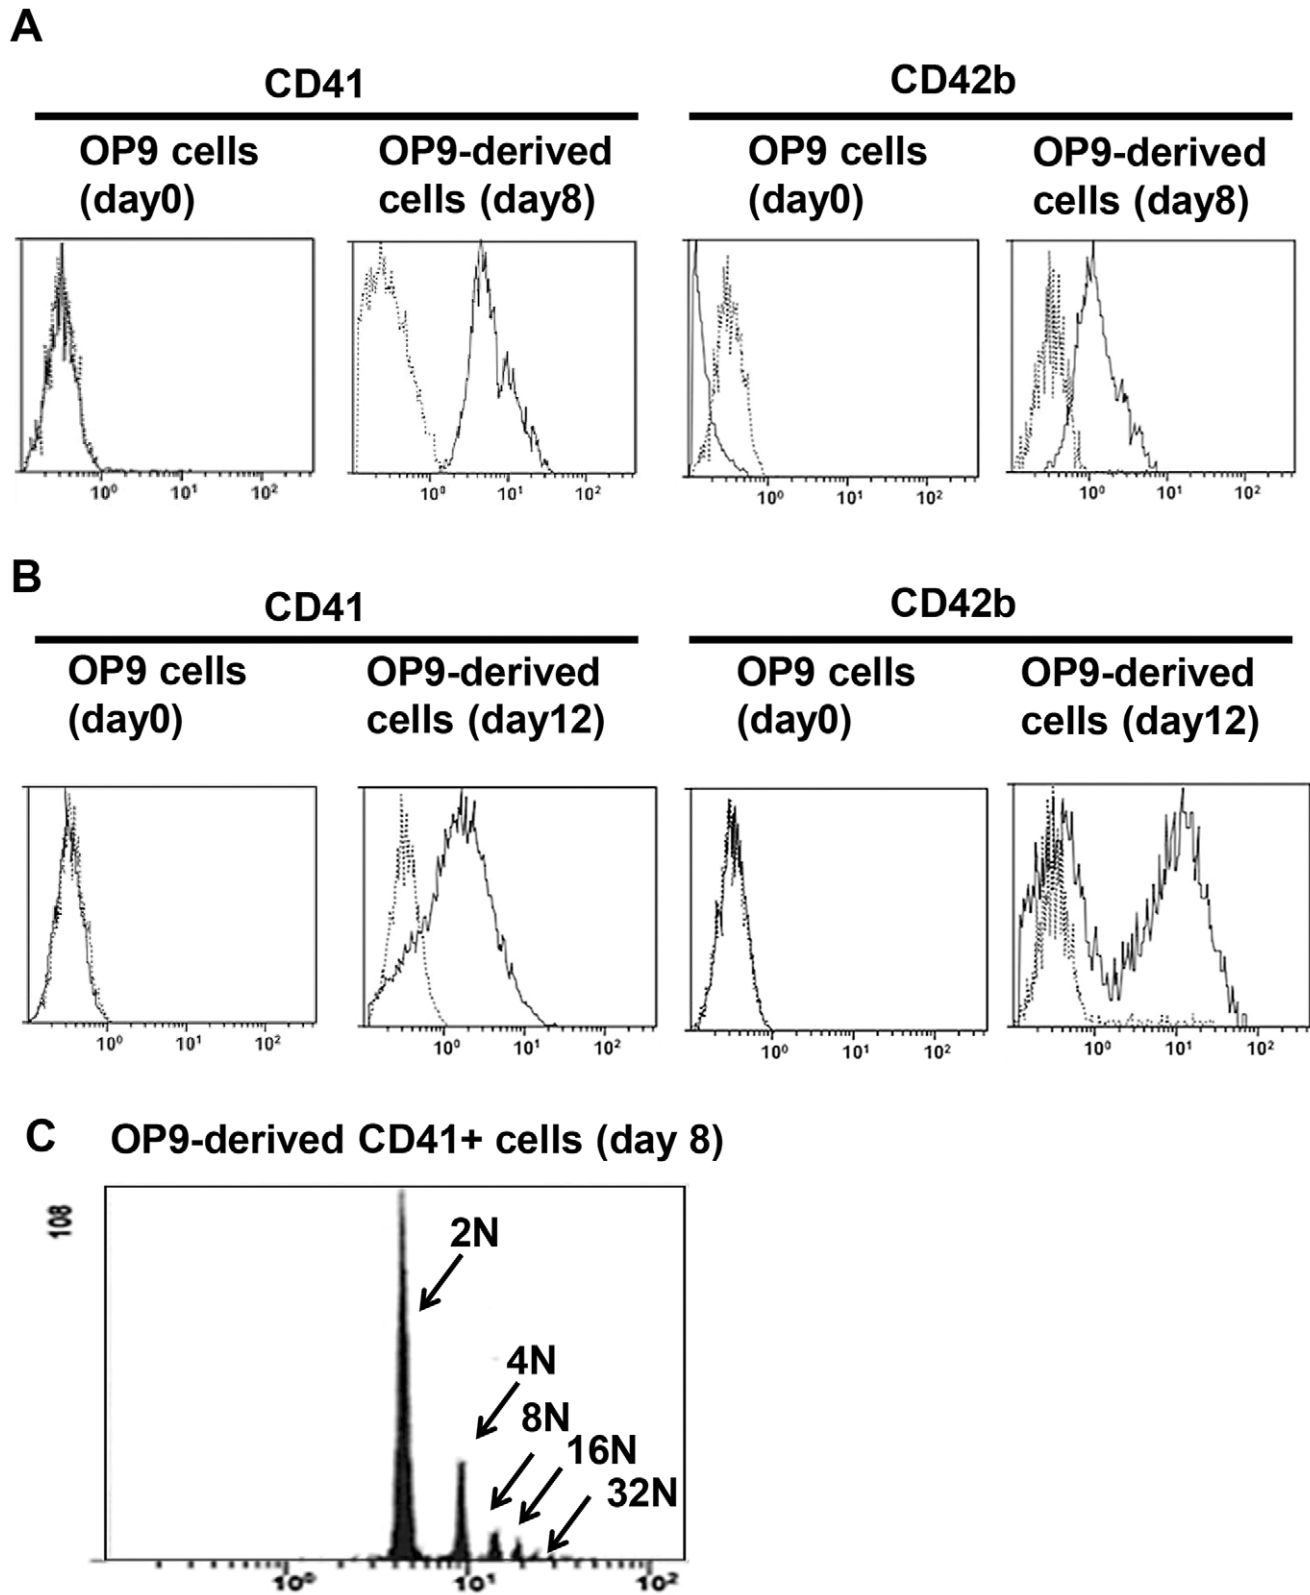

**Figure 1. Flow cytometric analyses for megakaryocytes and platelets differentiated from OP9 cells.** **A**, Representative flowcytometry histogram of CD41 and CD42b expression on megakaryocyte-sized cells. Dot-line shows data using isotype control. **B**, Representative flowcytometry histogram of CD41 and CD42b expression on platelet-sized cells. Dot-line shows data using isotype control. **C**, DNA ploidy analysis in OP9-derived CD41+ cells on day 8.

doi:10.1371/journal.pone.0058123.g001

## Methods

### Cell Culture for Differentiation into MKs and Platelets

OP9 cells were maintained as described previously [12]. To induce the differentiation of OP9 cells into MK lineages, OP9 cells were cultured for 12 to 14 days using MKLI medium comprised of Iscove's Modified Dulbecco's Medium supplemented with 2 mM L-glutamine, 100 U/ml penicillin G sodium, 0.1 mg/ml streptomycin sulfate, 0.5% bovine serum albumin, 4  $\mu$ g/ml LDL cholesterol, 200  $\mu$ g/ml iron-saturated transferrin, 10  $\mu$ g/ml insulin, 50  $\mu$ M 2- $\beta$ -mercaptoethanol, 20  $\mu$ M each nucleotide (ATP, UTP, GTP, and CTP), and 50 ng/ml thrombopoietin (TPO; a gift from Kyowa Hakko Kirin CO., Ltd.) [19–24]. Mouse ES cells (gifted by Dr. Niwa H, RIKEN Center, Kobe, Japan) were established as described previously [30]. We maintained the ES cells as described previously [21,31]. Primary mouse low-density bone marrow mononuclear cells (mBMMNCs) were obtained as described previously [23] and were then cultured in MKLI medium.

### Flow Cytometric Analyses

Surface marker analyses were performed on OP9 cells before the MK induction (day 0) and OP9 cells cultured in MKLI medium (OP9-derived cells). We used the directly labeled

fluorescein isothiocyanate (FITC)-conjugated antibodies for CD41 (also known as platelet glycoprotein IIb) (BD bioscience), and CD42b (also known as platelet glycoprotein Ib alpha) (EMFRET Analytics GmbH and Co.). The positive values (%) were calculated using cell number of binding to isotype control and cell number of binding to anti-CD41-antibody or anti-CD42b-antibody. Fluorescence-activated cell sorting was used to obtain CD41+ population from OP9-derived cells. OP9-derived MKs and platelets were counted as large-sized CD41+ cells and small-sized CD41+ cells, respectively [23]. The “platelet-sized” particles were defined using mouse platelets, and the plot is shown in Figure S1. DNA ploidy was assessed by interaction with propidium iodide (Sigma) as described previously [22].

### Morphologic Analyses

The ultrastructure for OP9-derived CD41+ cells on day 8 and mouse bone marrow cells was analyzed. These studies were done by transmission electron microscopy as described previously [32]. To examine proplatelet formation in OP9-derived cells, the OP9-derived CD41+ cells were plated on the fibrinogen-coated glass (100  $\mu$ g/ml) were incubated for 6 hours at 37 degree C. These cells were observed using scanning electron microscopy as described previously [33]. Also, the cells were fixed with 4% paraformaldehyde in Ca<sup>++</sup>- and Mg<sup>++</sup>-free Phosphate Buffered

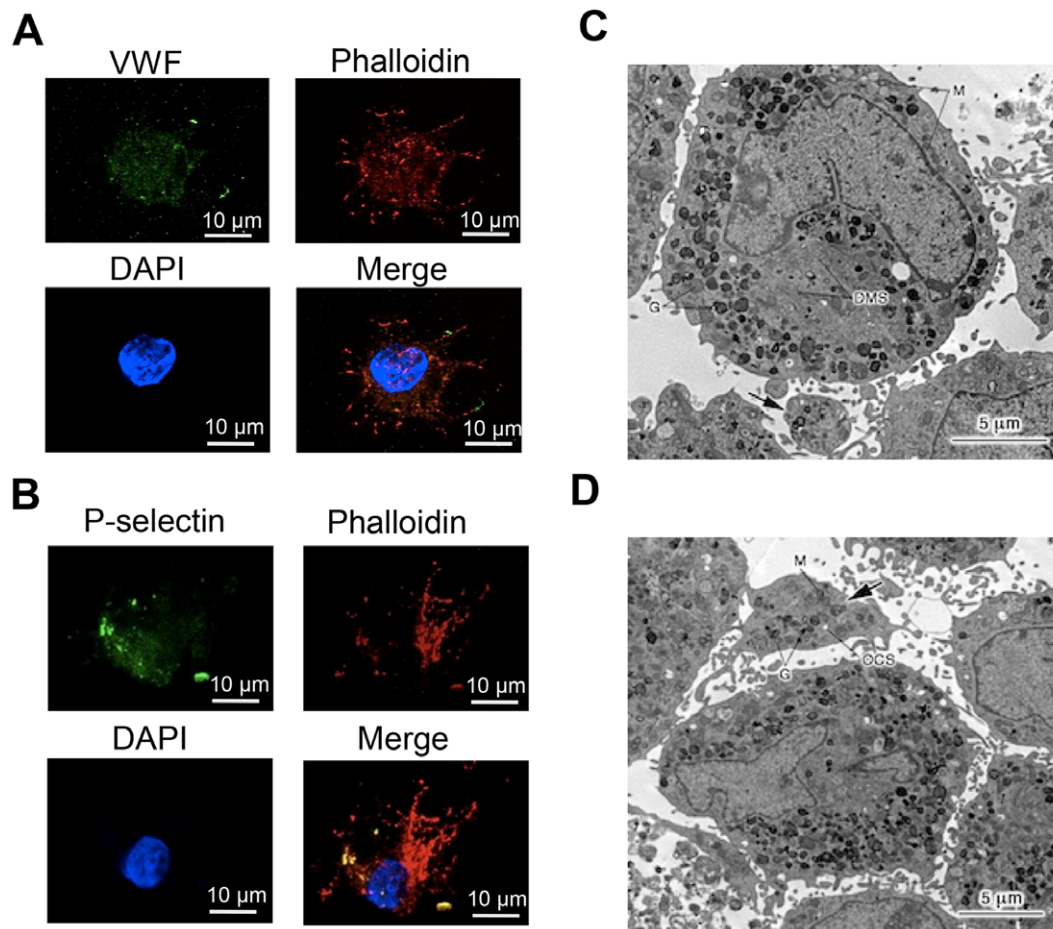

**Figure 2. Cell staining and morphologic analyses.** **A**, Cells stained with antibody for von Willebrand factor (green), Phalloidin (red) and DAPI (blue). **B**, Cells stained with antibody for P-selectin (green), Phalloidin (red) and DAPI (blue). **C, D**, Transmission electron micrograph of OP9-derived CD41+ cells. Megakaryocyte and platelet (arrow indicated in black): G, granule, DMS, demarcation membrane system, M, mitochondria, and OCS, open canalicular system.

doi:10.1371/journal.pone.0058123.g002

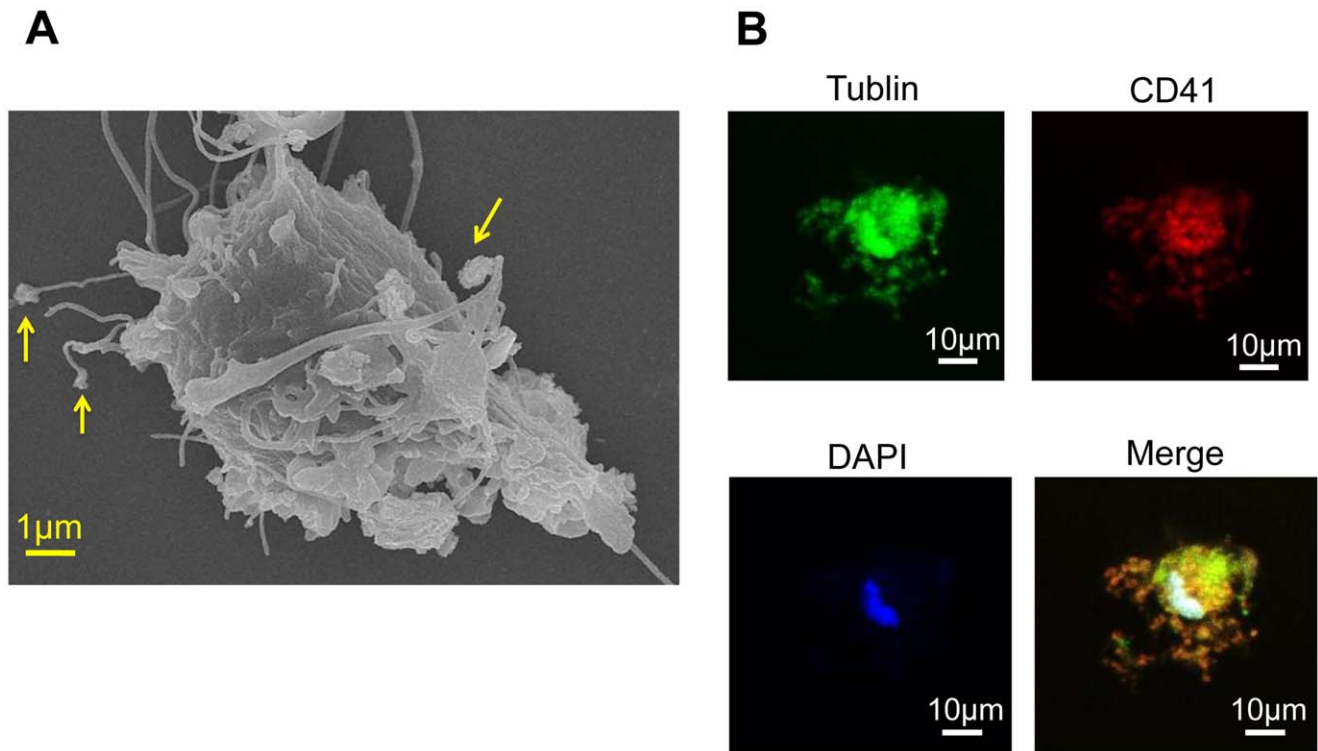

**Figure 3. Proplatelet formation in OP9-derived megakaryocyte.** **A.** Scanning electron micrograph of proplatelets (arrow indicated in yellow) forming OP9-derived CD41+ cells. **B.** Proplatelet-forming megakaryocyte was stained with antibody for CD41 (red) and alpha-tubulin (green), and DAPI (blue).

doi:10.1371/journal.pone.0058123.g003

Saline (PBS) for 15 minutes at room temperature and then permeabilized by 0.2% Triton X 100 in PBS for 5 minutes at room temperature. The samples for proplatelet formation were stained with phycoerythrin-conjugated antibody for CD41 (BD bioscience), unlabeled anti-alpha-tubulin antibody (Lab Vision Co.) and FITC-conjugated anti-rabbit antibody, and DAPI blue.

#### Immunohistochemical Studies

To analyze the expression of von Willebrand factor (VWF) and P-selectin in OP9-derived CD41+ cells on day 8, the cells stimulated with 10  $\mu$ M ADP and 10  $\mu$ M epinephrine were plated on the fibrinogen-coated glass (100  $\mu$ g/ml, coating concentration). The cells were fixed with 4% paraformaldehyde in  $\text{Ca}^{++}$ - and  $\text{Mg}^{++}$ -free PBS for 10 minutes at room temperature and then permeabilized by 0.2% Triton X 100 in PBS for 5 minutes at room temperature. The samples from OP9-derived CD41+ cells were stained with FITC-conjugated anti-VWF antibody (EMFRET Analytics GmbH and Co.) and FITC-conjugated anti-P-selectin antibody (EMFRET Analytics GmbH and Co.) for 60 min at room temperature. Cells were also stained DAPI blue and Texas Red Phalloidin (Invitrogen).

#### Functional Analyses for OP9-derived Platelets

Function for OP9-derived platelets was examined. The analyses of fibrinogen binding and P-selectin surface exposure after stimulation were performed on OP9-derived cells on day 12, as described previously [22]. FITC-conjugated anti-P-selectin antibody (EMFRET Analytics GmbH and Co.) was used for the analysis of P-selectin surface exposure in the presence or absence of stimulation.

#### Gene Expression Analyses

To carry out gene expression analyses by reverse transcription-polymerase chain reaction (RT-PCR), total RNA samples were prepared from OP9-derived cells on days 0, 4, and 8, mES cells, and mBMMNC-derived cells on days 0 and 4 after treatment with Trizol reagent (Invitrogen). cDNA samples with genomic DNA removal were obtained by QuaniTect Reverse Transcription (QIAGEN) or by QuaniTect Whole Transcriptome (QIAGEN) with DNase (Promega), according to manufacturer's protocols. Primers of RT-PCR for GATA1, GATA2, Fli1, FOG, p45NF-E2, and GAPDH were used as described previously [16]. The pre-made primers (Applied Biosystems) were used for RT-PCR for OCT3/4, SOX2, RUNX1, TPO, c-mpl, KLF1, and PU1. Quantitative real time-PCR was also performed on samples from OP9 cells and OP9-derived cells using pre-made primers (Applied Biosystems). The amount of target normalized to GAPDH was determined by evaluating expression:  $2^{-\Delta\Delta C_t}$ , where  $\Delta\Delta C_t = \Delta C_t - \Delta C_t \text{ cb}$ ,  $\Delta C_t$  was threshold cycle,  $\Delta C_t \text{ cb}$  was the  $\Delta C_t$  value of a sample,  $\Delta C_t \text{ cb}$  was that of the calibrator and meant the difference in threshold cycles between the target and reference.

#### Retroviral Vectors and Cell Culture

Retroviral vector for overexpression of p45NF-E2 in OP9 cells was used as described previously [19]. A CalPhos Mammalian Transfection Kit (Clontech) and AmphoPack-293 cells (Clontech), as packaging cells, were used according to the manufacturer's protocol. AmphoPack-293 cells were transfected with p45NF-E2 expression vector or empty vector. After 48 hours of transfection, retroviral supernatants were collected. OP9 cells were infected with the p45NF-E2 expression vector or empty vector (p45NF-E2-



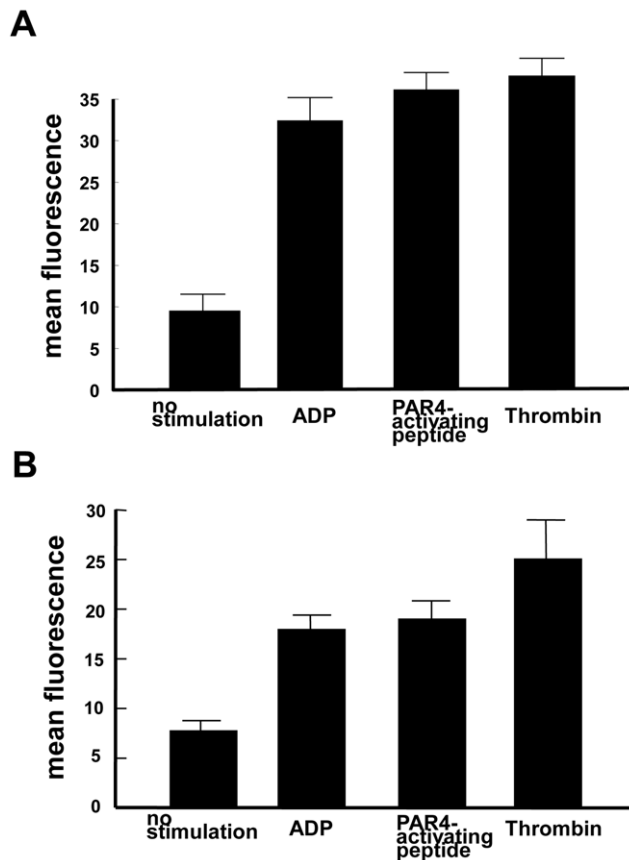

**Figure 4. Functional analyses for OP9-derived platelets.** **A**, By flow cytometry analysis, Alexa Fluor 488-labeled fibrinogen (100  $\mu$ g/ml) binding to platelets derived from OP9 cells was examined in the presence or absence of platelet stimulation reagents. **B**, The surface exposure of P-selectin was analyzed in the presence or absence of platelet stimulation reagents. doi:10.1371/journal.pone.0058123.g004

OP9 and empty-OP9). Each of cells was cultured in MKLI medium for 12 days.

### Statistics

Mean values of two groups were compared using Student's *t*-test. Statistical analysis was performed using StatView (ver 5.0, for Macintosh, SAS Institute Inc., Cary, NC). A *p* value of less than 0.05 was considered statistically significant.

## Results

### Differentiation of OP9 Cells into MKs and Platelets

We examined whether OP9 cells differentiate into MKs and platelets by using MKLI medium previously established to generate MKs and platelets from HSCs, ES cells, and preadipocytes. OP9 cells cultured for 6 days in MKLI medium resulted in adherent cells and a few floating cells. The OP9-derived cells on day 8 had adherent, loosely adherent, and floating cells, and most of cells on day 12 had floating cells (Figure S2A). Among OP9-derived cells on day 8, floating and loosely adherent cells morphologically resembling MKs derived from mBMMNCs cultured in MKLI medium (Figure S2B). These OP9-derived cells were characterized using surface markers, DNA polyploidy with nuclear staining, morphology using electron microscopy, and immunohistochemistry.

By flow cytometric analysis with MK lineage specific markers, approximately 95% and 60% of these OP9-derived MK-sized cells on day 8 expressed CD41, a surface marker throughout MK differentiation, and CD42b, a surface marker for the late stage of MK differentiation, respectively (Figure 1A). Approximately 70% and 60% of OP9-derived platelet-sized cells on day 12 expressed CD41 and CD42b, respectively (Figure 1B). Regarding the number of the OP9-derived MKs and platelets, approximately  $4 \times 10^4$  MKs and  $1 \times 10^5$  platelets were generated from  $1 \times 10^6$  OP9 cells before the MK induction. OP9 cells before the MK induction (day 0) did not express CD41 and CD42b (Figure 1A, 1B). DNA ploidy of OP9-derived CD41+ cells ranged from 2N to 32N (Figure 1C). Immunohistochemical analyses showed that VWF and P-selectin, cytoplasmic proteins of MK lineage cells, were positive in OP9-derived CD41+ cells (Figure 2A, 2B). Under electron microscopic observation, OP9-derived MK-sized CD41+ cells had typical organelles for MKs, such as granules, demarcation membrane system, and lobulated nuclei, and OP9-derived platelet-sized CD41+ cells showed typical features for platelets, such as granules, mitochondria, and open canalicular system (Figure 2C, 2D). The present observations were similar to what described in MKs derived from mBMMNCs (Figure S3). Also, the present observations were similar to what described in MKs and platelets derived from mouse ES cells, mouse preadipocyte cell line 3T3-L1, human bone marrow CD34-positive cells, and human adipose tissues [19,20]. OP9-derived MK-sized CD41+ cells were examined for proplatelet formation under scanning electron microscopic observation. We observed proplatelets forming OP9-derived MK-sized CD41+ cells (Figure 3A). Moreover, proplatelet-forming OP9-derived MK showing CD41 and alpha-tubulin was observed (Figure 3B). To examine whether OP9-derived platelets are functional, fibrinogen-binding assay was performed on OP9-derived platelet-sized cells on day 12. Binding of Alexa Fluor 488-labeled fibrinogen to OP9-derived platelet-sized cells was increased upon stimulation when assessed by mean fluorescence (mean  $\pm$  S.D.):  $9.7 \pm 0.9$  (no stimulation),  $25.7 \pm 0.3$  (10  $\mu$ M ADP),  $p < 0.0001$  (vs no stimulation),  $28.6 \pm 0.4$  (1.5 mM PAR4-activating peptide),  $p < 0.0001$  (vs no stimulation), and  $29.2 \pm 1.6$  (0.5 U/ml thrombin),  $p < 0.0001$  (vs no stimulation) (Figure 4A). The representative data of dot-plots in this assay are shown in Figure S4. Moreover, P-selectin surface exposure, a marker for platelet activation, on OP9-derived platelet-sized cells on day 12 was examined in the presence or absence of stimulation, and mean fluorescence (mean  $\pm$  S.D.) was  $7.8 \pm 1.1$  (no stimulation),  $17.9 \pm 1.5$  (10  $\mu$ M ADP),  $p = 0.0159$  (vs no stimulation),  $19.1 \pm 1.8$  (1.5 mM PAR4-activating peptide),  $p = 0.0162$  (vs no stimulation), and  $25.1 \pm 3.8$  (0.5 U/ml thrombin),  $p = 0.0162$  (vs no stimulation) (Figure 4B). These observations indicated that OP9 cells differentiated into MKs and platelets *in vitro*.

### Analyses of Gene Expressions of OP9 Cells during MK Differentiation

We then analyzed gene expression of candidate factors to elucidate mechanisms for the differentiation of OP9 cells into MKs and platelets. To examine whether this conversion goes through the status of cell pluripotency, the expressions of OCT3/4, specifically expressed in pluripotent cells, and SOX2, a key factor for the maintenance of cell pluripotency [34,35], were analyzed. Expression of both OCT3/4 and SOX2 was not detected in OP9 cells (day 0) and OP9-derived cells by RT-PCR (Figure 5). We also analyzed the gene expressions for transcription factors, p45NF-E2, FOG, Fli1, GATA1, GATA2, and RUNX1, that regulate megakaryopoiesis and thrombopoiesis [5–11]. These transcription factors, except for GATA1, were clearly detected in OP9 (day 0)

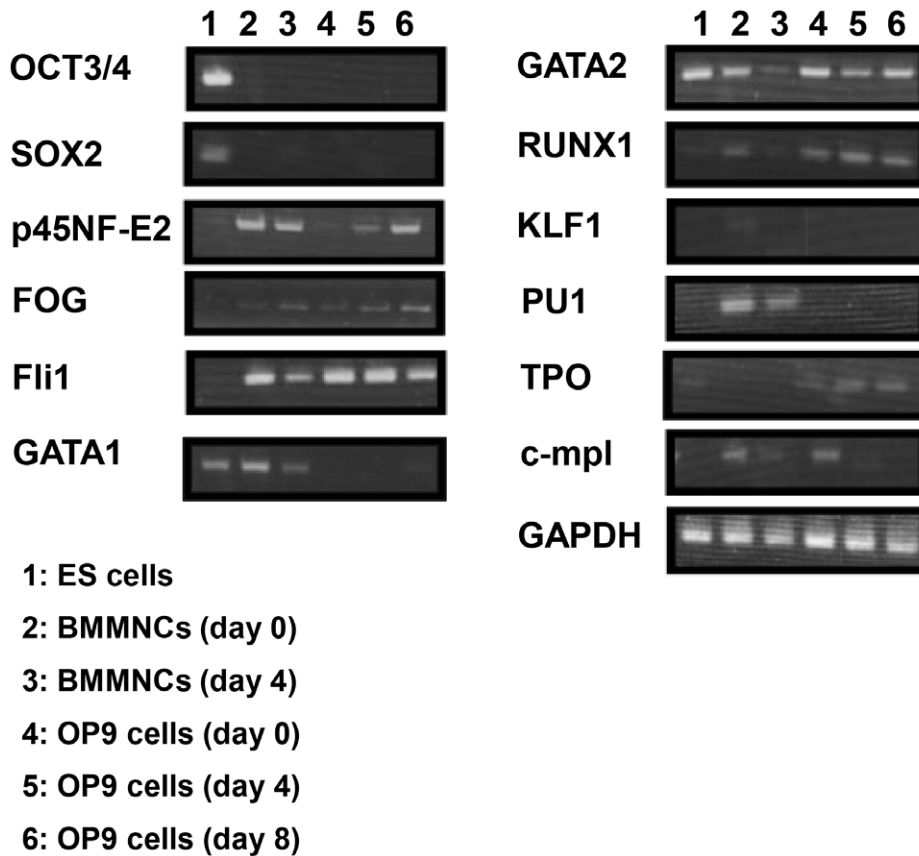

**Figure 5. Analyses of gene expression of OP9 cells during megakaryocyte differentiation.** Gene expression assessed by reverse transcription-PCR.  
 doi:10.1371/journal.pone.0058123.g005

and OP9-derived cells (days 4 and 8) (Figure 5). Because major cell population of BMMNCs on day 4 morphologically resembled that of OP9-derived cells on day 8, we used BMMNCs on days 0 and 4 as a control. OP9 cells (day 0) also showed gene expression of TPO and *c-mpl*, receptor for TPO (Figure 5). Regarding the key transcription factors for other hematopoietic cell lineages, PU.1 for leukocytes [36] and KLF1 for erythrocytes [37], were not detected in OP9 cells (day 0) and OP9-derived cells (days 4 and 8) (Figure 5). Among the observed transcription factors, p45NF-E2 expression was increased during the differentiation of OP9 cells into MKs, and expression levels of p45NF-E2 in OP9 cells (day 0) and OP9-derived cells (day 4) were measured by quantitative real-time PCR analysis. It was found that expression levels of OP9-derived cells (day 4) had  $3.91 \pm 0.08$ -fold higher than that of OP9 cells (day 0). Other transcription factors were also measured. It was for  $1.54 \pm 0.02$ -fold higher for FOG,  $0.03 \pm 0.00$  ( $0.0007$ )-fold higher for Fli1,  $0.20 \pm 0.03$ -fold higher for GATA2, and  $1.00 \pm 0.16$ -fold higher for RUNX1, as compared with those of OP9 cells (day 0). TPO expression levels of OP9-derived cells (day 4) had  $3.59 \pm 0.70$ -fold higher than that of OP9 cells (day 0). *c-mpl* expression levels of OP9-derived cells (day 4) had  $0.182 \pm 0.11$ -fold higher than that of OP9 cells (day 0). These results indicate that OP9 cells possess critical factors for MK differentiation and platelet production. Among them, the p45NF-E2 expression was increased during the differentiation of OP9 cells into MK lineages.

#### Enhanced Production of MKs and Platelets from OP9 cells Transfected with p45NF-E2

Based on increased expression of p45NF-E2 during differentiation of OP9 cells into MK lineages, we further studied the effect of OP9 cells transfected with p45NF-E2 on MK and platelet production. Transfection efficiency was estimated by DsRed expression, and approximately 50% of transfected OP9 cells was positive for DsRed expression, as assessed by flowcytometry (data not shown). Gene expression levels, assessed by qRT-PCR, of p45NF-E2 in p45NF-E2-OP9 cells on day 4 had  $37.68 \pm 11.36$ -fold higher than that in empty-vector-OP9 cells. The p45NF-E2-OP9 cells and empty-vector-OP9 cells were cultured in MKLI medium for 12 days. By flow cytometric analysis, nearly all of the p45NF-E2-OP9-derived MK-sized cells on day 7 expressed CD41, whereas approximately 60% of empty-vector-OP9-derived MK-sized cells on day 7 expressed CD41 (Figure 6A). Also, CD42b expression was approximately 50% and 20% of p45NF-E2-OP9- and empty-vector-OP9-derived MK-sized cells on day 7, respectively (Figure 6A). The  $1 \times 10^6$  OP9 cells (day 0) generated  $3.3 \pm 1.8 \times 10^4$  MKs for p45NF-E2-OP9 cells and  $2.2 \pm 1.6 \times 10^4$  ( $p = 0.4008$ ) MKs for empty-vector-OP9 cells. The effect of p45NF-E2-overexpressing OP9 cells on platelet production was also examined. CD41 expression was approximately 50% and 20% of p45NF-E2-OP9- and empty-vector-OP9-derived platelet-sized cells on day 12, respectively (Figure 6B), and CD42b expression was approximately 20% and 10% of p45NF-E2-OP9- and empty-vector-OP9-derived platelet-sized cells on day 12, respectively (Figure 6B). It was found that the number of p45NF-

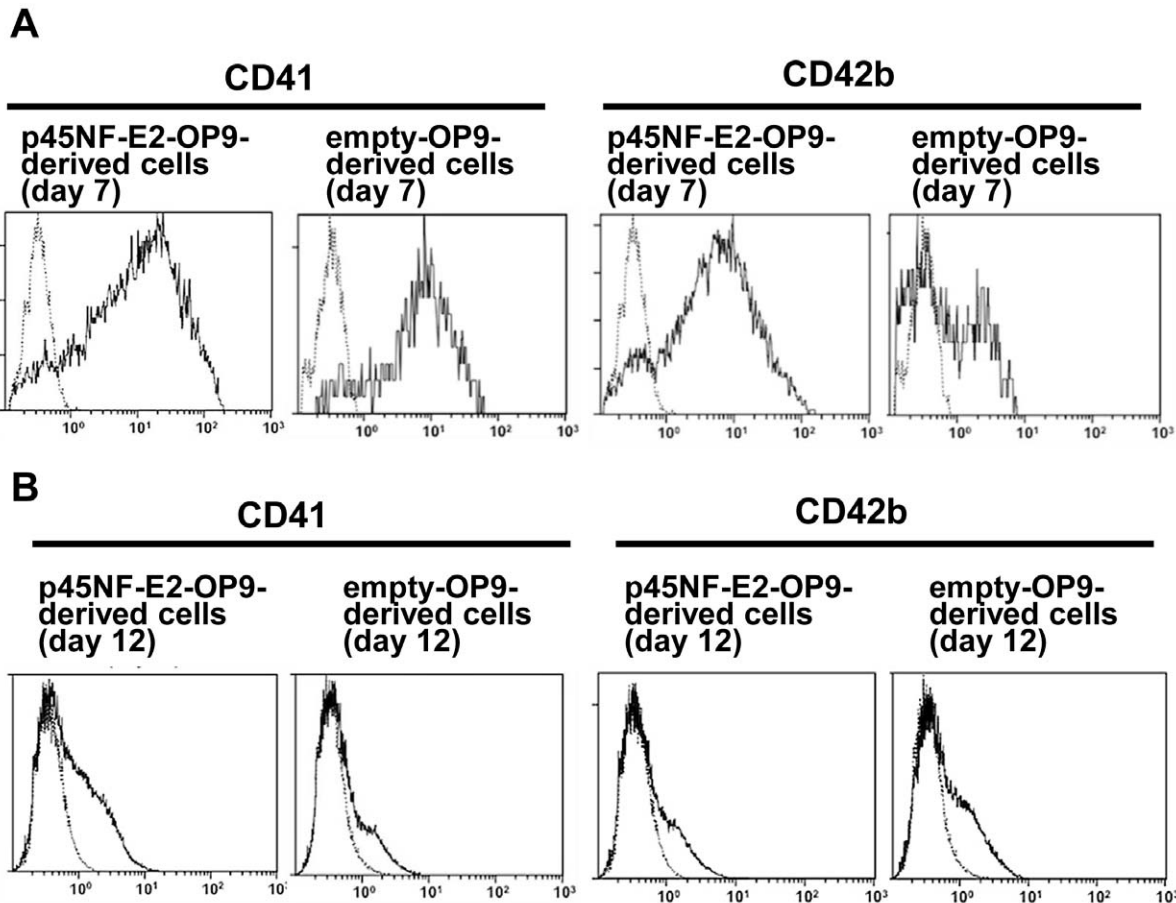

**Figure 6. Production of megakaryocytes and platelets from OP9 cells transfected with p45NF-E2.** **A**, Representative flowcytometry histogram of CD41 and CD42b expression on megakaryocyte-sized cells in each of samples introduced with the indicated vectors. Dot-line shows data using isotype control. **B**, Representative flowcytometry histogram of CD41 and CD42b expression on platelet-sized cells in each of samples introduced with the indicated vectors. Dot-line shows data using isotype control.  
doi:10.1371/journal.pone.0058123.g006

E2-OP9-derived platelet-sized CD41+ cells on day 12 showed approximately 3-fold higher than those in the empty-vector-OP9-derived platelet-sized CD41+ cells on day 12. The number of platelets generated from  $1 \times 10^6$  OP9 cells (day 0) was  $2.9 \pm 2.6 \times 10^5$  for the p45NF-E2-OP9-derived platelets and  $1.0 \pm 7.3 \times 10^5$  ( $p = 0.0518$ ) for the empty-vector-OP9-derived platelets. These findings indicate that p45NF-E2 has a critical role in the generation of MKs and platelets from OP9 cells, although the production of MKs and platelets was not significantly different between the p45NF-E2-OP9 cells and empty-vector-OP9 cells.

## Discussion

This study demonstrated that OP9 cells differentiated into MKs and platelets *in vitro* using MKLI medium previously established to differentiate HSC, ES cells, pre-adipocytes into MK lineages. The present findings provide the first evidence for the differentiation of OP9 cells into MK lineages. Regarding the efficiency of the MK and platelet production from OP9 cells, approximately  $4 \times 10^4$  MKs and  $1 \times 10^5$  platelets were generated from  $1 \times 10^6$  OP9 cells. On the other hand,  $1 \times 10^6$  human bone marrow mononuclear cells produced approximately  $6 \times 10^3$  MKs and  $3 \times 10^3$  platelets in a similar culture scale using MKLI medium [24]. Although it is difficult to compare precisely the efficiency of

the MK and platelet production among various stem cell sources, our observations suggested that OP9 cells possess high capacity of the differentiation into MK lineages *in vitro*.

OP9 cells cultured in maintenance medium express specific surface marker for MSC and were reported to be pre-adipocytes [28,29]. These cell lineage fate of mesenchymal cells is distinct from that of HSCs, and OP9 cells are widely used as feeder cells for differentiation of iPS cells and ES cells into hematopoietic cells and MK lineages [12–15,25–27]. However, the present study shows that OP9 cells themselves are the source of MKs and platelets. OP9-derived MKs and platelets were characterized by specific surface markers, DNA polyploidy, morphology using electron microscopy, and immunohistochemistry. These analyses have been performed on *in vitro*-generated MKs and platelets beginning with cell sources including HSCs, ES cells, and iPS cells. When MKs and platelets derived from iPS cells or ES cells are harvested in the differentiation study using OP9 co-culture system, there is a possibility that some of MK lineage cells are derived from OP9 cells.

The gene expression analyses indicated that differentiation of OP9 cells into MK lineages did not share the common mechanism with pluripotent cells. OP9 cells possess the important factors related to megakaryopoiesis and thrombopoiesis, and these observations are compatible with our previous findings that 3T3-L1 pre-adipocytes possess GATA2, RUNX1, Fli1, FOG1, and

p45NF-E2. The expression of GATA1 was not detected in OP9 cells and 3T3-L1 cells [19]. Furthermore, we did not observe the GATA1 expression during differentiation of OP9 cells into MKs. Although GATA1 was reported to be a critical factor for the erythroid and MK development, previous studies demonstrated that GATA2 coordinates MK differentiation in GATA1 deficient and mutant cells [38]. Also, the present study revealed that the differentiation of OP9 cells into MK lineages involves in a p45NF-E2-mediated mechanism. The NF-E2 transcriptional factor is a basic-leucine zipper hetero-dimer complex consisting of p45 subunit, known as tissue-restricted subunit, and the small Maf proteins, Maf K and Maf G, known as widely expressed in many cells [39–45]. Observations in p45NF-E2 deficient MKs suggested that p45NF-E2 is important in the MK terminal differentiation and platelet release [46,47]. On the other hand, the *in vitro* and *in vivo* study using p45NF-E2-overexpressing bone marrow cells showed additional roles of p45NF-E2 in early megakaryopoiesis [48]. We previously reported that fibroblasts transfected with p45NF-E2, Maf G and Maf K differentiated into MKs and platelets, whereas fibroblast did not differentiate into MK lineage cells. These observations support p45NF-E2, Maf G, and Maf K as critical factors for megakaryopoiesis and thrombopoiesis. In the present study, OP9 cells have Maf G and Maf K, and thus cells were transfected with P45NF-E2. The present findings provide additional information for the importance of p45NF-E2 in megakaryopoiesis and thrombopoiesis. Further studies are definitely needed to elucidate the detailed pathways that cause OP9 cells to differentiate into the MK lineage ultimately leading to platelet production.

In summary, OP9 cells differentiated into MKs and platelets, although OP9 cells have been widely used as feeder cells in differentiation of ES cells and iPSC cells into MKs and platelets. OP9 cells possess critical factors related to megakaryopoiesis and thrombopoiesis. The generation of MKs and platelets from OP9

cells could have important implications for study on the underlying mechanisms of megakaryopoiesis and thrombopoiesis.

## Supporting Information

### Figure S1 The plot of mouse platelets in flow cytometric analysis.

(TIFF)

### Figure S2 Megakaryocyte lineage cells were generated from OP9 cells in vitro. A, Schematic outline and pictures for OP9 cells and differentiated stages into megakaryocyte lineages. B,

Mouse bone marrow mononuclear cells were cultured in megakaryocyte lineage induction media for 7 days.

(TIFF)

### Figure S3 Transmission electron micrograph of mouse bone marrow mononuclear cells.

(TIFF)

### Figure S4 Alexa Fluor 488-labeled fibrinogen binding to platelets derived from OP9 cells was examined in the presence or absence of platelet stimulation reagents.

(TIFF)

## Acknowledgments

The authors thank Ms. Atsuko Igari and Ms. Yoko Sakanoue for technical assistance.

## Author Contributions

Conceived and designed the experiments: YM YI. Performed the experiments: YM YO HS. Analyzed the data: FA TS MM. Contributed reagents/materials/analysis tools: YM HS MM YI. Wrote the paper: YM YO YI.

## References

- Rao AK. (2003) Inherited defects in platelet signaling mechanisms. *J Thromb Haemost* 1: 671–681.
- Davi G, Patrono C. (2007) Platelet activation and atherothrombosis. *N Engl J Med* 357: 2482–2494.
- Clemenson KJ. (2012) Platelets and primary haemostasis. *Thromb Res* 129: 220–224.
- Kuter DJ. (1996) The physiology of platelet production. *Stem Cells* 14: 88–101.
- Pang L, Weiss MJ, Poncz M. (2005) Megakaryocyte biology and related disorders. *J Clin Invest* 115: 3332–3338.
- Deutsch VR, Tomer A. (2006) Megakaryocyte development and platelet production. *Br J Haematol* 134: 453–466.
- Chang Y, Bluteau D, Debili N, Vainchenker W. (2007) From hematopoietic stem cells to platelets. *J Thromb Haemost* 5: 318–327.
- Battinelli EM, Hartwig JH, Italiano JE. (2007) Delivering new insight into biology of megakaryopoiesis and thrombopoiesis. *Curr Opin Hematol* 14: 419–426.
- Kaushansky K. (2008) Historical review: megakaryocytopoiesis and thrombopoiesis. *Blood* 111: 981–986.
- Geddis AE. (2010) Megakaryopoiesis. *Semin Hematol* 47: 212–219.
- Reems JA, Pineault N, Sun S. (2010) In vitro megakaryocyte production and platelet biogenesis: state of the art. *Transfus Med Rev* 24: 33–43.
- Eto K, Murphy R, Kerrigan SW, Bertoni A, Stuhlmann H, et al. (2002) Megakaryocytes derived from embryonic stem cells implicate CalDAG-GEFI integrin signaling. *Proc Natl Acad Sci USA* 99: 12819–12824.
- Fujimoto TT, Kohata S, Suzuki H, Miyazaki H, Fujimura K. (2003) Production of functional platelets by differentiated embryonic stem (ES) cells in vitro. *Blood* 102: 4044–4051.
- Gaur M, Kamata T, Wang S, Moran B, Shattil SJ, et al. (2006) Megakaryocytes derived from human embryonic stem cells: a genetically tractable system to study megakaryocytopoiesis and integrin function. *J Thromb Haemost* 4: 436–442.
- Takayama N, Nishikii H, Usui J, Tsukui H, Sawaguchi A, et al. (2008) Generation of functional platelets from human embryonic stem cells in vitro via ES-sacs, VEGF-promoted structures that concentrate hematopoietic progenitors. *Blood* 111: 5298–5306.
- Nishikii H, Eto K, Tamura N, Hattori K, Heissig B, et al. (2008) Metalloproteinase regulation improves in vitro generation of efficacious platelets from mouse embryonic stem cells. *J Exp Med* 205: 1917–1927.
- Fuentes R, Wang Y, Hirsch J, Wang C, Rauova L, et al. (2010) Infusion of mature megakaryocytes into mice yields functional platelets. *J Clin Invest* 120: 3917–3922.
- Takayama N, Nishimura S, Nakamura S, Shimizu T, Ohnishi R, et al. (2010) Transient activation of c-MYC expression is critical for efficient platelet generation from human induced pluripotent stem cells. *J Exp Med* 207: 2817–2830.
- Ono Y, Wang Y, Suzuki H, Okamoto S, Ikeda Y, et al. (2012) Induction of functional platelets from mouse and human fibroblasts by p45NF-E2/Maf. *Blood* 120: 3812–3821.
- Matsubara Y, Saito E, Suzuki H, Watanabe N, Murata M, et al. (2009) Generation of megakaryocytes and platelets from human subcutaneous adipose tissues. *Biochem Biophys Res Commun* 378: 716–720.
- Matsubara Y, Suzuki H, Ikeda Y, Murata M. (2010) Generation of megakaryocytes and platelets from preadipocyte cell line 3T3-L1, but not the parent cell line 3T3, *in vitro*. *Biochem Biophys Res Commun* 402: 796–800.
- Matsubara Y, Murata M, Ikeda Y. (2012) Culture of megakaryocytes and platelets from subcutaneous adipose tissue and a preadipocyte cell line. *Methods Mol Biol* 788: 249–258.
- Kerrigan SW, Gaur M, Murphy RP, Shattil SJ, Leavitt AD. (2004) Caspase-12: a developmental link between G-protein-coupled receptors and integrin alphaIIb beta3 activation. *Blood* 104: 1327–1334.
- Ono M, Matsubara Y, Shibano T, Ikeda Y, et al. (2011) GSK-3beta negatively regulates megakaryocyte differentiation and platelet production from primary human bone marrow cells *in vitro*. *Platelets* 22: 196–203.
- Nakano T, Kodama H, Honjo T. (1994) Generation of lymphohematopoietic cells from embryonic stem cells in culture. *Science* 265: 1098–1101.
- Niwa A, Umeda K, Chang H, Saito M, Okita K, et al. (2009) Orderly hematopoietic development of induced pluripotent stem cells via Flk-1(+) hemoangiogenic progenitors. *J Cell Physiol* 221: 367–377.
- Kitajima K, Minchata K, Sakimura K, Nakano T, Hara T. (2011) In vitro generation of HSC-like cells from murine ESCs/iPSCs by enforced expression of LIM-homeobox transcription factor Lhx2. *Blood* 117: 3748–3758.



28. Gao J, Yan XL, Li R, Liu Y, He W, et al. (2010) Characterization of OP9 as authentic mesenchymal stem cell line. *J Genet Genomics* 37: 475–482.
29. Wolins NE, Quaynor BK, Skinner JR, Tzekov A, Park C, et al. (2006) OP9 mouse stromal cells rapidly differentiate into adipocytes: characterization of a useful new model of adipogenesis. *J Lipid Res* 47: 450–460.
30. Hooper M, Hardy K, Handyside A, Hunter S, Monk M (1987) HPRT-deficient (Lesch-Nyhan) mouse embryos derived from germline colonization by cultured cells. *Nature* 326: 292–295.
31. Masui S, Nakatake Y, Toyooka Y, Shimosato D, Yagi R, et al. (2007) Pluripotency governed by Sox2 via regulation of Oct3/4 expression in mouse embryonic stem cells. *Nat Cell Biol* 9: 625–635.
32. Suzuki H, Kaneko T, Sakamoto T, Nakagawa M, Miyamoto T, et al. (1994) Redistribution of alpha-granule membrane glycoprotein IIb/IIIa (integrin alpha IIb beta 3) to the surface membrane of human platelets during the release reaction. *J Electron Microsc (Tokyo)* 43: 282–289.
33. Suzuki H, Murasaki K, Kodama K, Takayama H. (2003) Intracellular localization of glycoprotein VI in human platelets and its surface expression upon activation. *Br J Haematol* 121: 904–912.
34. Lewitzky M, Yamanaka S. (2007) Reprogramming somatic cells towards pluripotency by defined factors. *Curr Opin Biotechnol* 18: 467–473.
35. Colman A, Dreesen O. (2009) Induced pluripotent stem cells and the stability of the differentiated state. *EMBO rep* 10: 714–721.
36. Gupta P, Gurudutta GU, Saluja D, Tripathi RP. (2009) PU.1 and Partners: Regulation of Hematopoietic Stem Cell Fate in Normal and Malignant Hematopoiesis. *J Cell Mol Med* 13: 4349–4363.
37. Bieker JJ. (2005) Probing the onset and regulation of erythroid cell-specific gene expression. *Mt Sinai J Med* 72: 333–338.
38. Vicente C, Conchillo A, García-Sánchez MA, Odero MD. (2012) The role of the GATA2 transcription factor in normal and malignant hematopoiesis. *Crit Rev Oncol Hematol* 82: 1–17.
39. Mignotte V, Wall L, deBoer E, Grosveld F, Romeo PH. (1989) Two tissue-specific factors bind the erythroid promoter of the human porphobilinogen deaminase gene. *Nucleic Acids Res* 17: 37–54.
40. Ney PA, Andrews NC, Jane SM, Safer B, Purucker ME, et al. (1993) Purification of the human NF-E2 complex: cDNA cloning of the hematopoietic cell-specific subunit and evidence for an associated partner. *Mol Cell Biol* 13: 5604–5412.
41. Peters LL, Andrews NC, Eicher EM, Davidson MB, Orkin SH, et al. (1993) Mouse microcytic anaemia caused by a defect in the gene encoding the globin enhancer-binding protein NF-E2. *Nature* 362: 768–770.
42. Chan JY, HanX-L, Kan YW. (1993) Isolation of cDNA encoding the human NF-E2 protein. *Proc Nat Acad Sci* 90: 11366–11370.
43. Igarashi K, Kataoka K, Itoh K, Hayashi N, Nishizawa M, et al. (1994) Regulation of transcription by dimerization of erythroid factor NF-E2 p45 with small Maf proteins. *Nature* 367: 568–572.
44. Andrews NC, Erdjument-Bromage H, Davidson MB, Tempst P, Orkin SH. (1993) Erythroid transcription factor NF-E2 is a haematopoietic-specific basic-leucine zipper protein. *Nature* 362: 722–728.
45. Andrews NC. (1998) The NF-E2 transcription factor. *Int J Biochem Cell Biol* 30: 429–432.
46. Shivdasani RA, Rosenblatt MF, Zucker-Franklin D, Jackson CW, Hunt P, et al. (1995) Transcription factor NF-E2 is required for platelet formation independent of the actions of thrombopoietin/MGDF in megakaryocyte development. *Cell* 81: 695–704.
47. Shivdasani RA. (2001) Molecular and transcriptional regulation of megakaryocyte differentiation. *Stem Cells* 19: 397–407.
48. Fock EL, Yan F, Pan S, Chong BH. (2008) NF-E2-mediated enhancement of megakaryocytic differentiation and platelet production in vitro and in vivo. *Exp Hematol* 36: 78–92.
